# Supplementary figures and images for: Incidence of knee cartilage surgery in Norway, 2008–2011
Source: HighWire-hosted journal article supplement (doi:10.1136/bmjopen-2015-008423), 2015-11-01

Appendix displays frequencies of all included procedures.

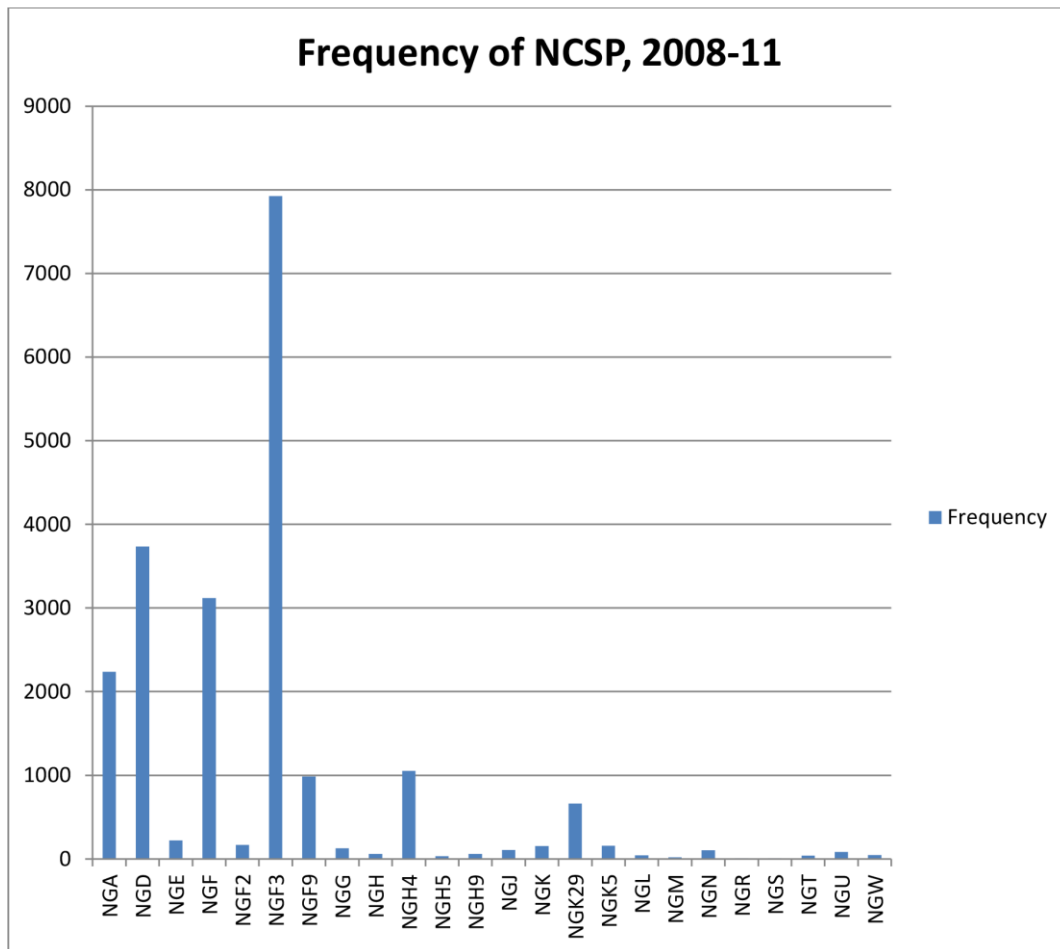

Supplement: bmjopen-2015-008423supp.pdf [file bmjopen-2015-008423supp.pdf]
